1 **More than efficacy revealed by single-cell analysis of antiviral therapeutics**

2

3

4 Wu Liu<sup>1,\*</sup>, Mehmet U. Caglar<sup>3</sup>, Zhangming Mao<sup>2</sup>, Andrew Woodman<sup>1</sup>, Jamie J. Arnold<sup>1</sup>, Claus O.  
5 Wilke<sup>3</sup>, and Craig E. Cameron<sup>1,\*</sup>

6

7

8 <sup>1</sup>Department of Biochemistry and Molecular Biology and <sup>2</sup>Department of Engineering Science and  
9 Mechanics, The Pennsylvania State University, University Park, Pennsylvania 16802, United States

10 <sup>3</sup>Center for Computational Biology and Bioinformatics, Institute for Cellular and Molecular Biology,  
11 and Department of Integrative Biology, The University of Texas at Austin, Austin, Texas 78712,  
12 United States

13

14 \*Correspondence: [wul28@psu.edu](mailto:wul28@psu.edu) (W.L.), [cec9@psu.edu](mailto:cec9@psu.edu) (C.E.C.)

15 **SUMMARY:**

16 Development of antiviral therapeutics emphasizes minimization of the effective dose and maximization  
17 of the toxic dose, first in cell culture and later in animal models. Long-term success of an antiviral  
18 therapeutic is determined not only by its efficacy but also by the duration of time required for drug-  
19 resistance to evolve. We have developed a microfluidic device comprised of ~6000 wells, with each  
20 well containing a microstructure to capture single cells. We have used this device to characterize  
21 enterovirus inhibitors with distinct mechanisms of action. In contrast to population methods, single-cell  
22 analysis reveals that each class of inhibitor interferes with the viral infection cycle in a manner that can  
23 be distinguished by principal component analysis. Single-cell analysis of antiviral candidates reveals  
24 not only efficacy but also properties of the members of the viral population most sensitive to the drug,  
25 the stage of the lifecycle most affected by the drug, and perhaps even if the drug targets an interaction  
26 of the virus with its host.

27

28 **KEYWORDS:** antiviral, mechanism of action, microfluidics, single-cell analysis, poliovirus,  
29 picornavirus

## 30 INTRODUCTION

31 Over the past few decades, the world has witnessed outbreaks of myriad RNA viruses,  
32 including West Nile Virus, severe acute respiratory syndrome (SARS) coronavirus, chikungunya  
33 virus, Ebola virus, Zika virus, and most recently the poliovirus (PV)-related viruses: enterovirus  
34 D68 (EV-D68) and enterovirus A71 (EV-A71) ([Antona et al., 2016](#); [Baize et al., 2014](#); [Burt et al.,](#)  
35 [2012](#); [Campbell et al., 2002](#); [Campos et al., 2015](#); [Peiris et al., 2003](#)). Unfortunately, viral  
36 emergence has outpaced the discovery and development of compounds capable of treating these  
37 pathogens. Because sporadic outbreaks come, go, and may never come again, development of  
38 broad-spectrum therapeutics exhibiting high barriers to resistance would have the greatest value.  
39 Unbiased screening of chemical libraries for antiviral agents using cell-based assays have no  
40 problem identifying active compounds of high potency. However, identifying the target and  
41 predicting the likelihood for evolution of resistance generally takes years of effort following  
42 compound discovery.

43 As a part of a study evaluating PV infection dynamics on the single-cell level, we  
44 observed that a chain-terminating antiviral ribonucleotide selectively eliminates the most-fit  
45 members of the viral population ([Guo et al., 2017](#)). This class of antiviral agent has always been  
46 touted as having a high barrier to resistance ([Jordheim et al., 2013](#)). The typical explanation for  
47 this high barrier is that amino acid substitutions in the active site of the viral RNA polymerase  
48 conferring resistance to the antiviral ribonucleoside also impair the specificity and/or efficiency  
49 of incorporation of natural ribonucleotides ([Carroll et al., 2003](#)). Elimination of the most-fit  
50 members of the viral population by an antiviral agent requires that resistance emerge from the  
51 surviving, low-fitness member of the population, which would ultimately require restoration of  
52 fitness for the population to survive the myriad mechanisms of host restriction ([Andino and](#)

53 [Domingo, 2015](#)). Restoration of fitness may be the insurmountable barrier precluding the  
54 development of resistance to chain-terminating antiviral ribonucleotides.

55         This study was designed to determine the extent to which single-cell analysis of antiviral  
56 agents can contribute to our understanding of antiviral therapeutics relative to traditional  
57 approaches. We describe a microfluidics device that can be used to produce complete dose-  
58 response curves. We have used this device to compare three, mechanistically-distinct classes of  
59 antiviral agents: a PV polymerase inhibitor (2'-C-methyl-adenosine, 2'-C-Me-A); a PV protease  
60 inhibitor (rupintrivir); and two HSP90 inhibitors (geldanamycin, GA, and ganetespib, GS). We  
61 find that single-cell analysis distinguishes these classes of inhibitors. We suggest that addition of  
62 single-cell analysis to the existing paradigm for preclinical development of antiviral therapies  
63 may have the potential to identify leads with limited potential for development of resistance.

## 64 **RESULTS**

65 **A device for single-cell analysis of the activity of antiviral agents.** Our initial foray into  
66 single-cell analysis of PV infection dynamics used cell density to control single-cell occupancy  
67 of wells of a microfluidic device (Guo et al., 2017). What this means practically is that most  
68 wells are empty. Reducing the number of events monitored by a mere factor of two takes us  
69 below the number of events required for statistical analysis of the data. Acquisition of a dose-  
70 response curve was therefore impossible using this first-generation device.

71 To address this problem, we created a multi-layer device as previously described (**Fig. 1a**)  
72 (Guo et al., 2017) but added a trapping structure to the channel layer of the device (**Figs. 1b** and  
73 **S1a**). Position of the trapping structure was guided by simulation (**Fig. 1c**), leading to placement  
74 of the trapping structure on the rear wall of each well (**Fig. 1d**). The device contains five  
75 independent zones, each containing 1140 wells for a total of 5700 wells. The device mounts  
76 easily to the stage of a microscope (**Fig. S1b**); the device in cross-section is shown in **Fig. S2**.  
77 Single-cell occupancy of the device was sensitive to the width of the channels used for loading  
78 (**Fig. S3a**) and cell density (**Fig. S3b**) with maximum occupancy near 90% (**Figs. 1d** and **S3**).  
79 Under conditions in which an inhibitor reduces infection to 10%, ~100 infected cells will be  
80 observed using this device. This number of events is more than enough for statistical analysis.

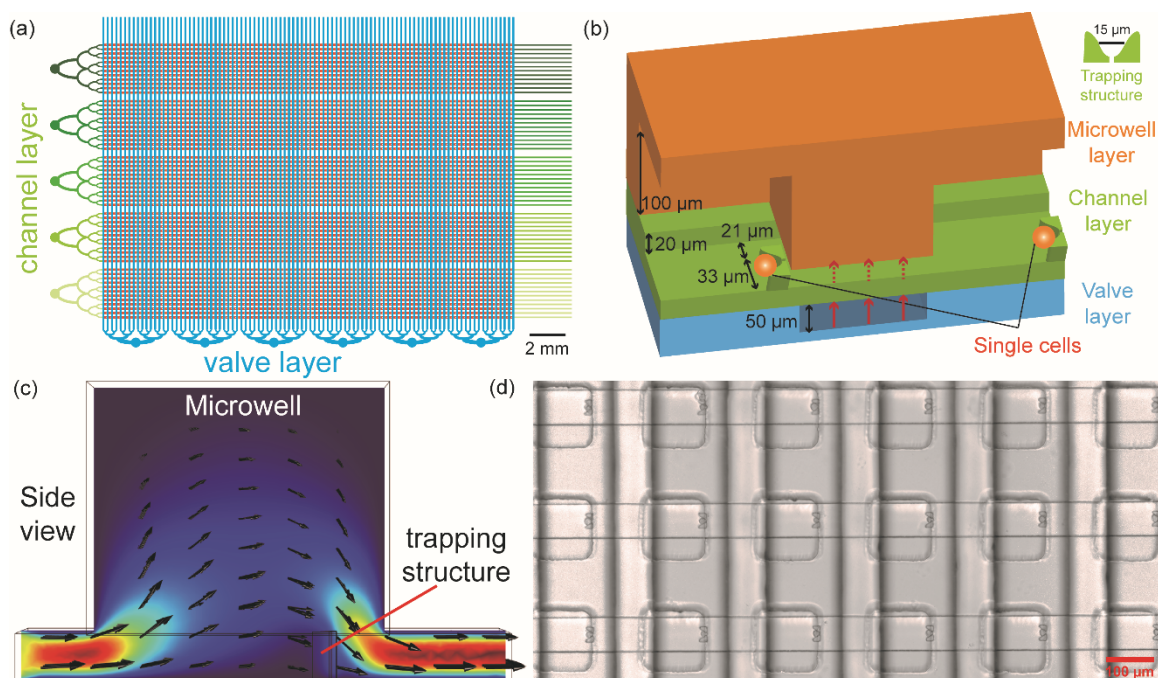

81

82 **Figure 1. Addition of cell-trapping microstructures to wells of a microfluidic device**  
83 **enhances single-cell occupancy.** (a) Schematic of the device. The following layers exist:  
84 microwell (not shown explicitly); channel (green); and valve (cyan). The device is divided into  
85 five sections of 1140 microwells (different shades of green for the channel layer), for a total of  
86 5700 microwells. (b) Schematic of two wells of the device with all relevant dimensions indicated.  
87 The microwell layer creates a physical barrier between adjacent wells. The barrier between  
88 adjacent wells is sealed with water emanating from the valve layer. Water in valve layer is sealed  
89 by application of air under pressure (20-30 psi). (c) Simulation of the flow velocity field in a  
90 microwell indicated that the outlet would maximize cell trapping by the microstructure. (d)  
91 Image showing cells captured by the microstructures in the microwells. The device was infused  
92 with cells ( $5 \times 10^5$  cells/mL) at rate of  $0.5 \mu\text{L}/\text{min}$ . Under optimal conditions, 86.1% (4902)  
93 microwells of the device contained single cells.

94 **Re-evaluation of a PV polymerase inhibitor.** Viral polymerases represent a well-established  
95 target of antiviral therapeutics. For example, cocktails used to treat human immunodeficiency  
96 virus infection and hepatitis C virus (HCV) infection include synthetic nucleoside analogues  
97 targeting reverse transcriptase and RNA-dependent RNA polymerase (RdRp), respectively  
98 (Cihlar and Ray, 2010; Sofia et al., 2012). The non-obligate, chain-terminating antiviral  
99 ribonucleoside, 2'-C-Me-A, is the prototype for the HCV RdRp inhibitor, sofosbuvir and related  
100 compounds (Eltahla et al., 2015). In a previous study, we evaluated infections that survived  
101 treatment when present at a concentration that reduces the number of infections by 50% (IC<sub>50</sub>).  
102 To our surprise, we observed selective ablation of cells infected with virus variants capable of the  
103 fastest rates of replication and the highest yields of replicated RNA (Guo et al., 2017). This  
104 experiment suffered from the inability to evaluate concentrations of drug higher than the value of  
105 the IC<sub>50</sub>. Here, we use 2'-C-Me-A to validate the new device.

106 For all experiments reported herein, we infect HeLa S3 cells off chip with PV engineered  
107 to express enhanced green fluorescent protein (PV-eGFP) at a multiplicity of infection of 0.5  
108 plaque-forming units per cell (PFU/cell), pellet and wash cells to remove free virus, suspend cells  
109 to a density of  $5 \times 10^5$  cells/mL, and load the microfluidic device. Each well is monitored for  
110 eGFP fluorescence every 30 min for a 24 h period, which gives rise to a population of time  
111 courses exhibiting substantial between-cell variability (**Fig. S4a**). We plot the percentage of  
112 infected cells as a function of drug concentration and fit to a hyperbola to obtain a value for the  
113 IC<sub>50</sub> value. In the case of 2'-C-Me-A, concentrations greater than 50  $\mu$ M exhibit toxicity  
114 (Stuyver et al., 2006); therefore, these data do not fit to a hyperbola (**Fig. S4b**). It is clear from  
115 this experiment, however, that the approach is sensitive enough to acquire data for a complete  
116 dose-response analysis (**Fig S4b**).

117 A major advantage of the single-cell platform is that the effect of a drug on the viable  
118 population can be determined. To analyze the single-cell data, we use five phenomenological  
119 parameters extracted from each time course (**Fig. S4c**). These parameters are: *maximum*  
120 fluorescence observed, which correlates to yield of genomic RNA; *slope* at the time of half-  
121 maximum fluorescence, which correlates to replication speed; *infection time*, which, to a first  
122 approximation, is the time it takes for an infection to go from start to finish akin to the virus  
123 generation time; *start-point*, which is the earliest time in which fluorescence can be detected; and  
124 *midpoint*, the time of half-maximum fluorescence. This analysis leads to a distribution of values  
125 formed from values measured in each cell. Our statistical analysis uses an unpaired two-tailed t-  
126 test to determine if a significant difference exists for the means of a given parameter under two  
127 experimental conditions. In these experiments, the area under the curve defining the distribution  
128 reflects the number of events monitored. We do not attempt to interpret a difference in the “fine”  
129 structure of the distributions.

130 Using this data-analysis pipeline to evaluate outcomes in the absence and presence of 2'-  
131 C-Me-A (50  $\mu$ M), we observed a statistically significant difference in the mean values for the  
132 maximum (**Fig. S4d**) and slope (**Fig. S4e**) parameters without a statistically significant change in  
133 the mean values for the remaining parameters (**Figs. S4f - S4h**). Tabulation of the data and  
134 statistical analysis for this experiment is provided in **Tables S1** and **S2**. These observations  
135 reproduce outcomes presented by us previously using the first-generation device (Guo et al.,  
136 2017). Members of the viral population with highest values for maximum and slope parameters  
137 are most sensitive to 2'-C-Me-A.

138  
139 **Evaluation of a PV 3C-protease inhibitor.** The observation that a subset of the viral population  
140 was most sensitive to 2'-C-Me-A was unexpected but could be easily rationalized by the notion



141 that increased replication efficiency should correlate to increased 2'-C-Me-AMP incorporation  
142 efficiency. Do inhibitors of other viral enzymes exhibit the same selectivity? Proteases of  
143 retroviruses and positive-sense RNA viruses responsible for polyprotein processing represent a  
144 second category of well-established antiviral therapeutics used in the cocktails to treat HIV and  
145 HCV, respectively (de Leuw and Stephan, 2018; Pokorna et al., 2009; Wlodawer and Vondrasek,  
146 1998). Inhibitors of the picornaviral protease responsible for polyprotein processing (3C) have  
147 been pursued for many years (Wang and Liang, 2010). For this study, we selected rupintrivir,  
148 which targets the 3C protease activity of all three types of polioviruses as well as that of other  
149 enteroviruses (Binford et al., 2005; De Palma et al., 2008).

150 We measured the impact of rupintrivir on establishment of PV infection in HeLa S3 cells  
151 (**Fig. 2a**). The IC<sub>50</sub> value was  $8.0 \pm 4.0$  nM, which agrees with values (20 nM) measured using  
152 conventional plaque assays (De Palma et al., 2008). We analyzed the single-cell data obtained at  
153 all concentrations (**Tables S3** and **S4**) but focused only on the concentrations approximating the  
154 IC<sub>50</sub> and  $2 \times$  IC<sub>50</sub>, 10 nM and 20 nM, respectively, to emphasize trends in the data. At both  
155 concentrations, we observed a statistically significant difference compared to the control for all  
156 parameters: maximum (**Fig. 2b**); slope (**Fig. 2c**); infection time (**Fig. 2d**); start point (**Fig. 2e**);  
157 and midpoint (**Fig. 2f**). This outcome with rupintrivir is clearly distinct from that above with 2'-  
158 C-Me-A. We conclude that not all antiviral agents interfere with the viral population in the same  
159 manner or at the same stage(s) of the lifecycle.

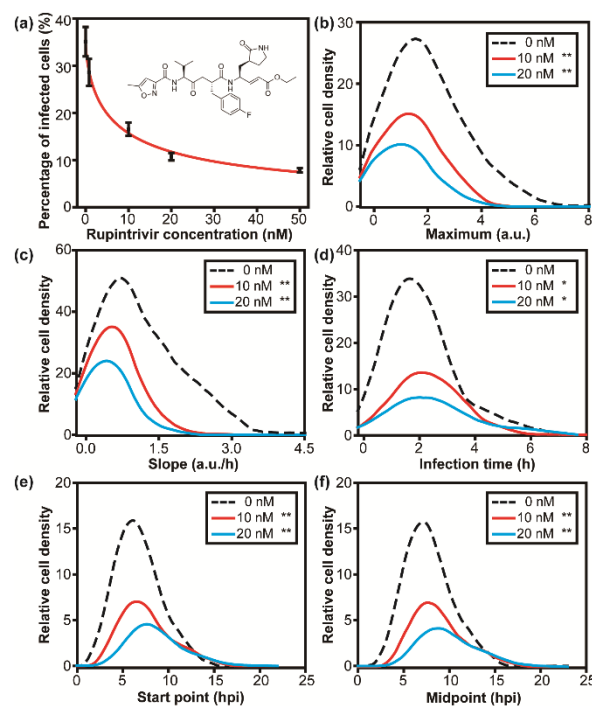

160

161 **Figure 2. Evaluation of rupintrivir, a PV 3C protease inhibitor. (a)** Dose-response analysis.

162 Percentage of single, infected (green) cells was determined as a function of rupintrivir

163 concentration. **(b-f)** Distributions for each parameter in the presence of 10 or 20 nM rupintrivir

164 were compared to that in the absence of drug using a t-test. A single asterisk indicates a p-value

165 less than 0.05; two asterisks indicate a p-value is less than 0.005. Numerical values for

166 experimental parameters are provided in **Table S3** and statistical analysis in **Table S4**. The

167 parameters presented in the panels are as follows: **(b)** maximum; **(c)** slope; **(d)** infection time; **(e)**

168 start point; **(f)** midpoint.

169 **Evaluation of HSP90 inhibitors.** Compounds antagonizing the function of cellular chaperones  
170 represent an emergent class of anti-cancer and antiviral therapeutics ([Chatterjee and Burns, 2017](#);  
171 [Geller et al., 2012](#)). Chaperones of the heat-shock-protein-90 (HSP90) family are required when  
172 the cell is growing fast and/or producing high levels of proteins, as observed in cancer cells or in  
173 virus-infected cells. Seminal studies from the Frydman and Andino laboratories demonstrate a  
174 clear, essential role for HSP90 in production of infectious PV virions. However, every step of the  
175 virus lifecycle has been suggested as a target for HSP90 when viruses outside of the picornavirus  
176 family are considered ([Geller et al., 2012](#); [Wang et al., 2017](#)). The benefit of targeting antiviral  
177 therapeutics to cellular proteins is that the likelihood for evolution of resistance is minimized  
178 ([Geller et al., 2007](#)).

179 We have used geldanamycin (GA), because it is a potent inhibitor of HSP90 (nM range)  
180 that is active against PV ([Geller et al., 2007](#)). The presence of GA reduced the number of  
181 infections established by  $22 \pm 4\%$  with an IC<sub>50</sub> value of  $30 \pm 8$  nM (**Fig. 3a**). An earlier study  
182 did not observe an impact of GA prior to virus assembly; however, it is possible that a reduction  
183 of the magnitude shown here would be concealed by experimental error ([Geller et al., 2007](#)).  
184 Because infection is monitored by eGFP, which requires virus entry, genome replication, and  
185 genome translation, interference with any of these steps would lead to a reduction in the number  
186 of eGFP-positive cells. It is clear, however, that translation and folding of eGFP are not altered in  
187 the presence of the highest concentration of GA used in this experiment (**Fig. S5**).

188 Analysis of the single-cell data is presented in **Tables S5** and **S6**. The mean of the  
189 distribution of values for the maximum parameter did not change in the presence of GA (**Fig. 3b**),  
190 in contrast to the inhibitors targeting viral proteins. Observation of a statistically significant  
191 difference in the distribution of the values for the infection-time parameter was concentration

192 dependent (**Fig. 3d**). A statistically significant difference for mean of the distributions for the  
193 remaining parameters was observed at concentrations corresponding to the IC50 and above (**Figs.**  
194 **3c, 3e and 3f**). A third signature of antiviral action is therefore revealed with GA.

195         Given the interest in using HSP90 inhibitors as therapeutics for cancer, a variety of  
196 compounds exist ([Hwang et al., 2009](#); [Sidera and Patsavoudi, 2014](#)). For example, ganetespib  
197 (GS) is an HSP90 inhibitor that differs from GA substantially in chemical structure (compare  
198 inset in **Fig. S6** to that in **Fig. 3a**), has a higher affinity for HSP90 than GA ([Prince et al., 2015](#)),  
199 but is thought to have the same mechanism of action ([Roe et al., 1999](#); [Ying et al., 2012](#)). Use of  
200 GS provides an important test of the capacity of the single-cell analysis to reveal common  
201 signature for compounds with common mechanisms.

202         In contrast to observations with GA, GS reduced the number of infections established by  
203  $70 \pm 14\%$  with an IC50 of  $3 \pm 1$  nM. Analysis of the single-cell data is presented in **Tables S7**  
204 and **S8**. The impact of GS on the five phenomenological parameters were the same as observed  
205 for GA (**Fig. S6**). In this case, it is clear that mechanistically identical compounds yield identical  
206 signatures at the single-cell level.

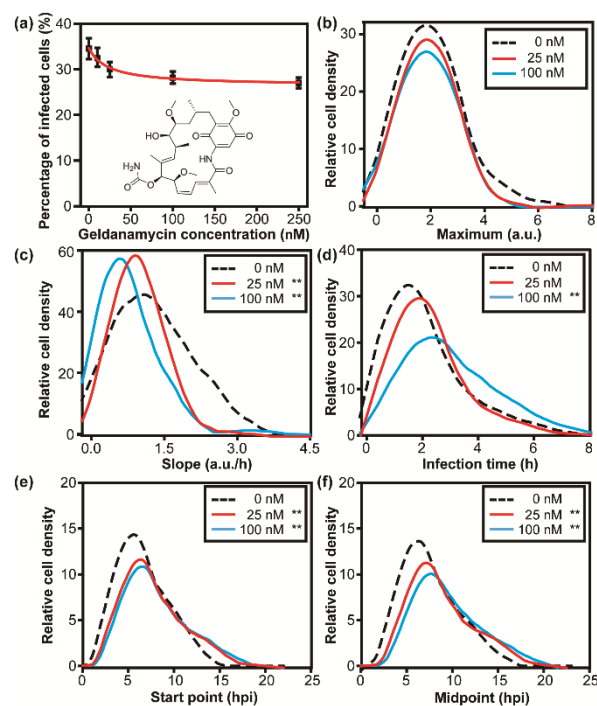

207

208 **Figure 3. Evaluation of geldanamycin (GA), an HSP90 inhibitor.** (a) Dose-response analysis.

209 Percentage of single, infected (green) cells was determined as a function of GA concentration. (b-

210 f) Distributions for each parameter in the presence of 25 or 100 nM GA were compared to that in

211 the absence of drug using a t-test. A single asterisk indicates a p-value less than 0.05; two

212 asterisks indicate a p-value less than 0.005. Numerical values for experimental parameters are

213 provided in **Table S5** and statistical analysis in **Table S6**. The parameters presented in the panels

214 are as follows: (b) maximum; (c) slope; (d) infection time; (e) start point; (f) midpoint.

215 **Evaluation of antiviral drug combinations.** The long-term utility of an antiviral therapy is  
216 determined, in part, by the time required for resistance mutants to emerge. One approach to  
217 delaying or even eliminating the emergence of drug-resistant mutants is the use of antiviral  
218 combinations (Dunning et al., 2014; Hofmann et al., 2009). What is often evaluated is the ability  
219 of two drugs to exhibit greater efficacy (synergy) in preventing infection in combination than  
220 observed when either drug is used alone. We evaluated the ability of 2'-C-Me-A to synergize  
221 with GA by treating cells with the concentrations of one or both at their IC50 values (**Fig. 4a**). In  
222 the absence of drug,  $34 \pm 3\%$  of cells in the device were infected. That number was reduced to  $18$   
223  $\pm 2\%$ ,  $30 \pm 3\%$ , or  $15 \pm 3\%$  in the presence of 2'-C-Me-A, GA, or the combination thereof,  
224 respectively. Based on this observation alone, the conclusion would be that this combination of  
225 antiviral agents is not even additive. Analysis of the entire single-cell dataset is presented in  
226 **Tables S9 and S10**. Because 2'-C-Me-A exhibits the most substantial antiviral effect relative to  
227 the DMSO control, here we compare the combination to 2'-C-Me-A alone. We observed a  
228 statistically significant difference for all parameters (**Figs. 4b - 4f**). Single-cell analysis therefore  
229 has the ability to reveal efficacy of drug combinations masked at the population level. We  
230 performed the comparable experiment with GS and reached the same conclusion (**Fig. S7, Tables**  
231 **S10 and S11**).

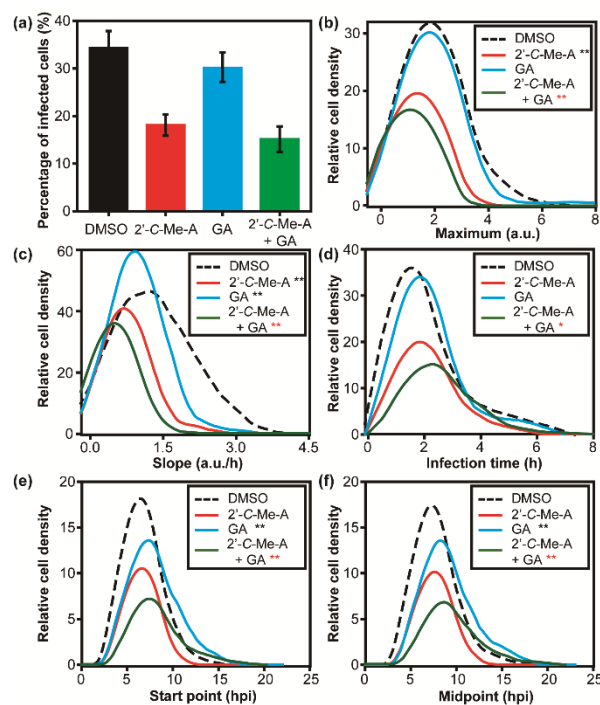

232

233 **Figure 4. Evaluation of an antiviral drug combination: 2'-C-Me-A and GA.** (a) Combination  
234 of 2'-C-Me-A and GA is not synergistic based on the fraction of established infections.  
235 Percentage of single, infected (green) cells was determined in the presence of 50  $\mu$ M 2'-C-Me-A,  
236 25 nM GA, or the combination of the two drugs. (b-f) Distributions for each parameter in the  
237 presence of the combination were compared to that in the presence of GA alone using a t-test.  
238 Numerical values for experimental parameters are provided in **Table S9** and statistical analysis in  
239 **Table S10**. The parameters presented in the panels are as follows: (b) maximum; (c) slope; (d)  
240 infection time; (e) start point; (f) midpoint.

241 **Evaluation of single-cell data by using principal component analysis (PCA).** Our evaluation  
242 of three classes of anti-PV drugs revealed three unique signatures based on changes to the  
243 phenomenological parameters used to describe infection dynamics. We reasoned that PCA might  
244 provide an even more robust approach to compare datasets using our five parameters. As shown  
245 in **Fig. 5**, PCA resolves each class of inhibitor from the other, as well as from outcomes in the  
246 absence of drug. Importantly, the mechanistically related but chemically distinct inhibitors of  
247 HSP90 cluster by PCA (see GA and GS in **Fig. 5**). We conclude that single-cell analysis of  
248 antiviral therapeutics can provide not only information on the efficacy of a drug but also  
249 information on the mechanism of action. This experimental paradigm should have a  
250 transformative impact on the drug-development process.



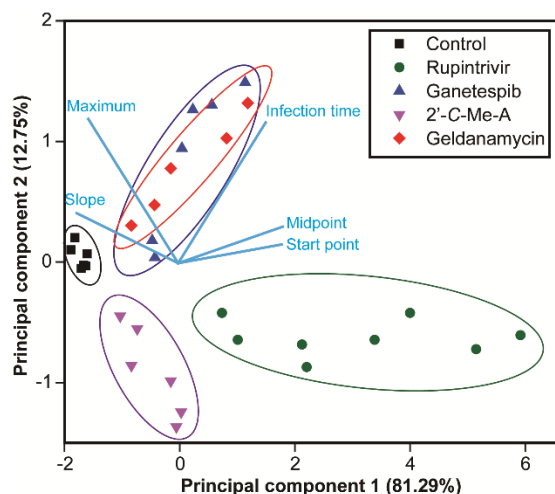

251

252 **Figure 5. Mechanistic classes of antiviral agents distinguished by principal component**  
253 **analysis (PCA) of single-cell data.** Points representing groups of single cells are colored  
254 according to compound identities with each point representing a different drug-treatment  
255 concentration. PCA was performed using the mean values of the maximum, slope, infection time,  
256 start point and midpoint from the various drug-treatment concentrations and control groups. The  
257 top two principal components accounted for 94% of the total variance. The light blue lines  
258 indicate the relationship between variables in the space of the first two components.

## 259 **DISCUSSION**

260           The era of single-cell virology has begun ([Combe et al., 2015](#); [Guo et al., 2017](#); [Russell et](#)  
261 [al., 2018](#)). Infection outcomes in cells are determined, in part, by stochastic processes ([Heldt et al.,](#)  
262 [2015](#)). For example, the presence and abundance of viral-restriction factors and viral-replication-  
263 promoting factors of the host are largely governed by stochastic gene expression ([Raj and van](#)  
264 [Oudenaarden, 2008](#)). As a result, substantial between-cell variation exists in all quantifiable  
265 parameters of infection. An underappreciated consequence of the behavior of systems such as  
266 these is the non-self-averaging nature of these systems, which means that the population average  
267 of any single-cell parameter will almost certainly fail to represent the dynamics within any single  
268 cell ([Derrida, 1997](#); [Wiseman and Domany, 1998](#)). The practical complication arising from this  
269 phenomenon is that changes in the average kinetics observed in a growth curve for a virus caused  
270 by a perturbation, for example exposure to an antiviral therapeutic, will not inform accurately the  
271 step(s) of the viral lifecycle impacted most by the perturbation.

272           With this perspective in mind, it is not surprising that our previous evaluation of an  
273 antiviral ribonucleotide using a single-cell approach revealed the unexpected finding that the  
274 most-fit members of the viral population were most susceptible to this class of compounds ([Guo](#)  
275 [et al., 2017](#)). This observation left one major unresolved question: do all effective antiviral  
276 therapeutics target the same subpopulation of viruses or do unique signatures exist for distinct  
277 mechanistic classes of antiviral therapeutics? Addressing these questions is the central objective  
278 of this study.

279           Our first-generation microfluidic device for on-chip investigation of viral infection  
280 dynamics relied on cell density as the mechanism to achieve isolation of single cells in wells of  
281 the device, an approach which leaves most wells of the device empty ([Guo et al., 2017](#)). We have

282 redesigned the device to add physical cell-trapping structures to each well. The outcome of  
283 which is the ability to achieve single-cell occupancy of ~90% of the ~6000 wells of the device  
284 (**Figs. 1, S1-S3**). The enhanced occupancy enabled the complete characterization of antiviral  
285 therapeutics by permitting the acquisition of complete dose-response curves (e.g. **Fig. 2a**).

286 The three classes of antiviral therapeutics chosen target a viral polymerase (2'-C-  
287 methyladenosine, 2'-C-Me-A, **Fig. S4**), a viral protease (rupintrivir, **Fig. 2**), or a host factor,  
288 HSP90, (geldanamycin, GA, **Fig. 3**; ganetespib, GS, **Fig. S6**). Our data-analysis pipeline  
289 emphasizes five phenomenological parameters with correlates to traditional parameters for  
290 assessment of the viral lifecycle.<sup>7</sup> The major finding of this study is that each class of antiviral  
291 therapeutics exhibited a unique signature with respect to the five phenomenological parameters  
292 measured and so much so that it was possible to use principal component analysis (PCA) to  
293 stratify the different therapeutic classes (**Fig. 5**). Importantly, both GA and GS overlapped by  
294 PCA despite their substantial differences in structure and efficacy (**Fig. 5**).

295 To our knowledge, this study represents the first analysis of a range of antiviral  
296 therapeutics on viral infection dynamics at the single-cell level. The resolution afforded by this  
297 approach is unprecedented when compared to other cell-based approaches, which only provide a  
298 measure of efficacy. Given the substantial effort required to go from compound to mechanism  
299 using the traditional experimental paradigm, the ability of single-cell analysis to inform  
300 mechanism should make this approach a welcome addition to the drug discovery and  
301 development toolbox. It is not uncommon for analogues to be synthesized during the drug-  
302 development process that lose specificity or even function by a different mechanism of action,  
303 single-cell analysis has the potential to reveal changes such as these at the start of the analysis  
304 instead of much, much later in the development process. Finally, although we have used antiviral  
305 agents to demonstrate the power of single-cell analysis, use of this technology and approach will

306 be applicable to the discovery and development of any class of therapeutics that can be assessed  
307 in cell culture.

## 308 **METHODS**

309 **Cells.** HeLa and HeLa S3 cells were obtained from American Type Culture Collection (ATCC)  
310 and maintained in DMEM/F12 (1:1) (Life Technologies) supplemented with 10% fetal bovine  
311 serum (FBS, Atlanta Biologicals) and 100 IU/mL penicillin–streptomycin (Corning), in a  
312 humidified atmosphere of 95% air and 5% CO<sub>2</sub> at 37 °C.

313 **Viruses.** To generate EGFP-tagged poliovirus used in this work, pMo-EGFP-PV-WT plasmid  
314 was linearized with ApaI and purified with QIAEX II Gel Extraction Kit (Qiagen, Netherlands).  
315 With the linearized plasmid as the template, viral RNA was transcribed at 37°C for 5.5 hours in a  
316 20-μL reaction medium containing 350 mM HEPES pH 7.5, 32 mM magnesium acetate, 40 mM  
317 dithiothreitol (DTT), 2 mM spermidine, 28 mM nucleoside triphosphates (NTPs), 0.025 μg/μL  
318 linearized DNA, and 0.025 μg/μL T7 RNA polymerase. After removing magnesium  
319 pyrophosphate in the mixture by centrifugation for 2 minutes, RNA concentration was measured  
320 by scanning the gel at fluorescence mode with a Typhoon 8600 scanner (Promega, USA). Then, 5  
321 μg of viral RNA were utilized to transfect HeLa cells cultured at 37°C by electroporation. Virus  
322 was harvested by three repeated freeze-thaw cycles, centrifuged at 3000 rpm for 5 minutes, and  
323 suspended in 0.5% nonidet P-40 (NP-40). For purification, the supernatant was mixed with 1  
324 volume of 20% PEG-8000/1 M NaCl solution and incubated overnight at 4°C. After  
325 centrifugation at 8000 × g for 10 minutes at 4°C, the pellet was resuspended in PBS and filtered  
326 with Centricon® Plus-70 (EMD Millipore, USA). Plaque assay was performed to determine the  
327 virus titer.

328 **Microfluidic devices.** The microfluidic layers were fabricated from polydimethylsiloxane  
329 (PDMS, GE RTV615) by standard soft lithography techniques. The molds were fabricated by

330 coating photoresist SU-8 25/50 with desired thicknesses on a silicon wafer and photolithographic  
331 patterning (Figure S1 and S2). Premixed PDMS prepolymer and curing agent (ratio 5/1) were  
332 poured onto the mold for valve layer and cured. Premixed PDMS prepolymer and curing agent  
333 (ratio 20/1) were spin-coated on the mold for channel layer at 1500 rpm for 1 minute and  
334 incubated at 65 °C for 20 min. Then the valve layer was released from the mold and placed on the  
335 channel layer with alignment. The assembly was baked at 65 °C overnight for efficient bonding.  
336 The assembly was further bonded with alignment to the microwells layer cured from premixed  
337 PDMS prepolymer and curing agent (ratio 20/1) by baking at 65 °C overnight. The obtained  
338 device was further bonded to a glass slide to prevent deformation when applying a pressure to the  
339 valves.

340 **On-chip experiments.** Dimethyl sulfoxide (DMSO) and rupintrivir were purchased from Sigma  
341 Chemical Co. (St. Louis, MO, USA). 2'-C-methyladenosine (2'-C-Me-A) was obtained from  
342 Carbosynth Limited (Compton, Berkshire, UK). Solutions of geldanamycin and ganetespib in  
343 DMSO were kindly provided by Dr. Xin Zhang (Department of Chemistry, The Pennsylvania  
344 State University) and Dr. Judith Frydman (Department of Biology, Stanford University),  
345 respectively. All the antiviral compounds were pre-diluted in DMSO for use. For no drug groups,  
346 same volumes of DMSO were spiked into the culture medium.

347 For each group,  $2 \times 10^5$  HeLa S3 cells were cultured with drug-containing medium for 1 h. Then  
348 the cells were centrifuged, resuspended in PBS, and mixed with EGFP-PV at the MOI of 0.5  
349 PFU/cell. After shaking at 140 rpm for 30 min, the cells were centrifuged and resuspended in  
350 mediums with corresponding treatments. With a PHD Ultra syringe pump (Harvard Apparatus),  
351 the cell suspensions were infused to the inlets of a microfluidic device for trapping of single-cells  
352 for 5 min. Afterwards, a pressure of 30 psi was applied to the valves to isolate the microwells.

353 The device was placed in the chamber of a stage top WSKM GM2000 incubation system (Tokai,  
354 Japan) adapted to a Nikon Eclipse Ti inverted microscope (Nikon, Japan) equipped with a  
355 ProScan II motorized flat top stage (Prior Scientific, USA). With this setup, bright-field and  
356 fluorescence images of the microwells were automatically acquired every 30 minutes from 2.5  
357 hpi to 24 hpi. In each image, 36 ( $6 \times 6$ ) microwells were included with a CFI60 Plan Apochromat  
358 Lambda 10 $\times$  objective and a Hamamatsu C11440 camera.

359 **Data processing.** A customized MATLAB script was employed to extract the fluorescence  
360 intensity and background intensity for each microwell in each fluorescent image. (Fluorescence  
361 intensity - Background)/Background was calculated to represent the relative intensity. Meanwhile,  
362 wells containing two or more infected cells and showing auto-fluorescence or out-of-focus  
363 signals were manually excluded. As a result, the fluorescence intensity of each infected single-  
364 cell over time could be obtained. With a customized package of R, the maximum, slope, infection  
365 time, start point and midpoint were derived (Caglar et al., 2018). For comparison of different  
366 experiments, the intensities were further normalized to uniformize the mean values of the  
367 maximums for the no drug groups (2.00 a.u. in this work). The distributions of cell densities were  
368 plotted with the area under each curve representing the relative number of infected cells (given  
369 100 cells for no drug group).

370

## 371 **Supplementary Information**

372 The following is provided: design of the microfluidic device; influence of channel width on  
373 single-cell trapping; effect of 2'-C-meA and ganetespib at different concentrations on viral

374 replication; means, standard deviations and p-values of all of the parameters measured for all of  
375 the experiments.

## 376 **Acknowledgements**

377 This work was supported by grant AI12056 from NIAID, NIH to C.O.W. and C.E.C.. A.W. is the  
378 recipient of a postdoctoral fellowship from the American Heart Association. W.L. thanks Dr.  
379 Sixing Li, Dr. Peng Li, Dr. Po-Hsun Huang and Liqiang Ren for helpful discussions. C.E.C.  
380 thanks the following: Dr. Susanna Manrubia for sharing her thoughts on non-self-averaging  
381 systems; Dr. Judith Frydman and Dr. Raul Andino for encouraging us to evaluate inhibitors of  
382 HSP90.

383

## 384 **Author Contributions**

385 W.L. and C.E.C. designed the experiments. W.L. conducted the experiments. A.W. and J.J.A.  
386 contributed unique reagents. W.L., M.U.C., and Z.M. performed image and data analysis. W.L.,  
387 M.U.C., A.W., J.J.A., C.O.W., and C.E.C. analyzed the data. W.L. and C.E.C. wrote the  
388 manuscript.

389

## 390 **Declaration of Interests**

391 The authors declare no competing financial interest.

392



## 393 **References**

- 394 Andino, R., and Domingo, E. (2015). Viral quasispecies. *Virology* 479, 46-51.
- 395 Antona, D., Kossorotoff, M., Schuffenecker, I., Mirand, A., Leruez-Ville, M., Bassi, C., Aubart,  
396 M., Moulin, F., Lévy-Bruhl, D., Henquell, C., et al. (2016). Severe paediatric conditions linked  
397 with EV-A71 and EV-D68, France, May to October 2016. *Eurosurveillance* 21, 11-14.
- 398 Baize, S., Pannetier, D., Oestereich, L., Rieger, T., Koivogui, L., Magassouba, N., Soropogui, B.,  
399 Sow, M. S., Keïta, S., De Clerck, H., et al. (2014). Emergence of Zaire Ebola virus disease in  
400 Guinea. *N. Engl. J. Med.* 371, 1418-1425.
- 401 Binford, S. L., Maldonado, F., Brothers, M. A., Weady, P. T., Zalman, L. S., Meador, J. W.,  
402 Matthews, D. A., and Patick, A. K. (2005). Conservation of amino acids in human rhinovirus 3C  
403 protease correlates with broad-spectrum antiviral activity of rupintrivir, a novel human rhinovirus  
404 3C protease inhibitor. *Antimicrob. Agents Chemother.* 49, 619-626.
- 405 Burt, F. J., Rolph, M. S., Rulli, N. E., Mahalingam, S., and Heise, M. T. (2012) Chikungunya: a  
406 re-emerging virus. *Lancet* 379, 662-671.
- 407 Caglar, M. U., Teufel, A. I., and Wilke, C. O. (2018). Sicegar: R package for sigmoidal and  
408 double-sigmoidal curve fitting. *PeerJ* 6, e4251.
- 409 Campbell, G. L., Marfin, A. A., Lanciotti, R. S., and Gubler, D. J. (2002). West Nile virus.  
410 *Lancet Infect. Dis.* 2, 519-529.
- 411 Campos, G. S., Bandeira, A. C., and Sardi, S. I. (2015). Zika virus outbreak, Bahia, Brazil.  
412 *Emerg. Infect. Dis.* 21, 1885-1886.

413 Carroll, S. S., Tomassini, J. E., Bosserman, M., Getty, K., Stahlhut, M. W., Eldrup, A. B., Bhat,  
414 B., Hall, D., Simcoe, A. L., LaFemina, R., et al. (2003). Inhibition of hepatitis C virus RNA  
415 replication by 2'-modified nucleoside analogs. *J. Biol. Chem.* 278, 11979-11984.

416 Chatterjee, S., and Burns, T. F. (2017). Targeting heat shock proteins in cancer: a promising  
417 therapeutic approach. *Int. J. Mol. Sci.* 18, 1978.

418 Cihlar, T., and Ray, A. S. (2010). Nucleoside and nucleotide HIV reverse transcriptase inhibitors:  
419 25 years after zidovudine. *Antiviral Res.* 85, 39-58.

420 Combe, M., Garijo, R., Geller, R., Cuevas, J. M., and Sanjuán, R. (2015). Single-cell analysis of  
421 RNA virus infection identifies multiple genetically diverse viral genomes within single infectious  
422 units. *Cell Host Microbe* 18, 424-432.

423 de Leuw, P., and Stephan, C. (2018). Protease inhibitor therapy for hepatitis C virus-infection.  
424 *Expert Opin. Pharmacother.* 19, 577-587.

425 De Palma, A. M., Pürstinger, G., Wimmer, E., Patick, A. K., Andries, K., Rombaut, B., De  
426 Clercq, E., and Neyts, J. (2008). Potential use of antiviral agents in polio eradication. *Emerg.*  
427 *Infect. Dis.* 14, 545-551.

428 Derrida, B. (1997). From random walks to spin glasses. *Physica D* 107, 186-198.

429 Dunning, J., Baillie, J. K., Cao, B., and Hayden, F. G. (2014). Antiviral combinations for severe  
430 influenza. *Lancet Infect. Dis.* 14, 1259-1270.

431 Eltahla, A. A., Luciani, F., White, P. A., Lloyd, A. R., and Bull, R. A. (2015). Inhibitors of the  
432 hepatitis C virus polymerase, mode of action and resistance. *Viruses* 7, 5206-5224.

433 Geller, R., Taguwa, S., and Frydman, J. (2012). Broad action of Hsp90 as a host chaperone  
434 required for viral replication. *Biochim. Biophys. Acta* 1823, 698-706.

- 435 Geller, R., Vignuzzi, M., Andino, R., and Frydman, J. (2007). Evolutionary constraints on  
436 chaperone-mediated folding provide an antiviral approach refractory to development of drug  
437 resistance. *Genes Dev.* *21*, 195-205.
- 438 Guo, F., Li, S., Caglar, M. U., Mao, Z., Liu, W., Woodman, A., Arnold, J. J., Wilke, C. O.,  
439 Huang, T. J., and Cameron, C. E. (2017). Single-cell virology: on-chip investigation of viral  
440 infection dynamics. *Cell Rep.* *21*, 1692-1704.
- 441 Heldt, F. S., Kupke, S. Y., Dorl, S., Reichl, U., and Frensing, T. (2015). Single-cell analysis and  
442 stochastic modelling unveil large cell-to-cell variability in influenza A virus infection. *Nat.*  
443 *Commun.* *6*, 8938.
- 444 Hofmann, W. P., Soriano, V., and Zeuzem, S. (2009). Antiviral combination therapy for treatment  
445 of chronic hepatitis B, hepatitis C, and human immunodeficiency virus infection. In *Antiviral*  
446 *Strategies*. (Berlin, Heidelberg: Springer), pp. 321-346.
- 447 Hwang, M., Moretti, L., and Lu, B. (2009). HSP90 inhibitors: multi-targeted antitumor effects  
448 and novel combinatorial therapeutic approaches in cancer therapy. *Curr. Med. Chem.* *16*, 3081-  
449 3092.
- 450 Jordheim, L. P., Durantel, D., Zoulim, F., and Dumontet, C. (2013). Advances in the  
451 development of nucleoside and nucleotide analogues for cancer and viral diseases. *Nat. Rev.*  
452 *Drug Discov.* *12*, 447-464.
- 453 Peiris, J. S., Lai, S. T., Poon, L. L., Guan, Y., Yam, L. Y., Lim, W., Nicholls, J., Yee, W. K.,  
454 Yan, W. W., Cheung, M. T., et al. (2003). Coronavirus as a possible cause of severe acute  
455 respiratory syndrome. *Lancet* *361*, 1319-1325.

- 456 Pokorna, J., Machala, L., Rezacova, P., and Konvalinka, J. (2009). Current and novel inhibitors  
457 of HIV protease. *Viruses* *1*, 1209-1239.
- 458 Prince, T. L., Kijima, T., Tatokoro, M., Lee, S., Tsutsumi, S., Yim, K., Rivas, C., Alarcon, S.,  
459 Schwartz, H., Khamit-Kush, K., et al. (2015). Client proteins and small molecule inhibitors  
460 display distinct binding preferences for constitutive and stress-induced HSP90 isoforms and their  
461 conformationally restricted mutants. *PLoS One* *10*, e0141786.
- 462 Raj, A., and van Oudenaarden, A. (2008). Nature, nurture, or chance: stochastic gene expression  
463 and its consequences. *2008*, *135*, 216-226.
- 464 Roe, S. M., Prodromou, C., O'Brien, R., Ladbury, J. E., Piper, P. W., and Pearl, L. H. (1999).  
465 Structural basis for inhibition of the Hsp90 molecular chaperone by the antitumor antibiotics  
466 radicicol and geldanamycin. *J. Med. Chem.* *42*, 260-266.
- 467 Russell, A. B., Trapnell, C., and Bloom, J. D. (2018). Extreme heterogeneity of influenza virus  
468 infection in single cells. *Elife* *7*, e32303.
- 469 Sidera, K., and Patsavoudi, E. (2014). HSP90 inhibitors: current development and potential in  
470 cancer therapy. *Recent Pat. Anticancer Drug Discov.* *9*, 1-20.
- 471 Sofia, M. J., Chang, W. S., Furman, P. A., Mosley, R. T., and Ross, B. S. (2012). Nucleoside,  
472 nucleotide, and non-nucleoside inhibitors of hepatitis C virus NS5B RNA-dependent RNA-  
473 polymerase. *J. Med. Chem.* *55*, 2481-2531.
- 474 Stuyver, L. J., McBrayer, T. R., Tharnish, P. M., Clark, J., Hollecker, L., Lostia, S., Nachman, T.,  
475 Grier, J., Bennett, M. A., Xie, M. Y., et al. (2006). Inhibition of hepatitis C replicon RNA  
476 synthesis by beta-D-2'-deoxy-2'-fluoro-2'-C-methylcytidine: a specific inhibitor of hepatitis C  
477 virus replication. *Antivir. Chem. Chemother.* *17*, 79-87.

- 478 Wang, H. M., and Liang, P. H. (2010). Picornaviral 3C protease inhibitors and the dual 3C  
479 protease/coronaviral 3C-like protease inhibitors. *Expert Opin. Ther. Pat.* *20*, 59-71.
- 480 Wang, Y., Jin, F., Wang, R., Li, F., Wu, Y., and Kitazato, K. (2017). HSP90: a promising broad-  
481 spectrum antiviral drug target. *Arch. Virol.* *162*, 3269-3282.
- 482 Wiseman, S., and Domany, E. (1998). Finite-size scaling and lack of self-averaging in critical  
483 disordered systems. *Phys. Rev. Lett.* *81*, 22-25.
- 484 Wlodawer, A., and Vondrasek, J. (1998). Inhibitors of HIV-1 protease: A major success of  
485 structure-assisted drug design. *Annu. Rev. Biophys. Biomol. Struct.* *27*, 249-284.
- 486 Ying, W., Du, Z., Sun, L., Foley, K. P., Proia, D. A., Blackman, R. K., Zhou, D., Inoue, T.,  
487 Tatsuta, N., Sang, J., et al. (2012). Ganetespib, a unique triazolone-containing Hsp90 inhibitor,  
488 exhibits potent antitumor activity and a superior safety profile for cancer therapy. *Mol. Cancer*  
489 *Ther.* *11*, 475-484.

490

491

## Graphical Abstract

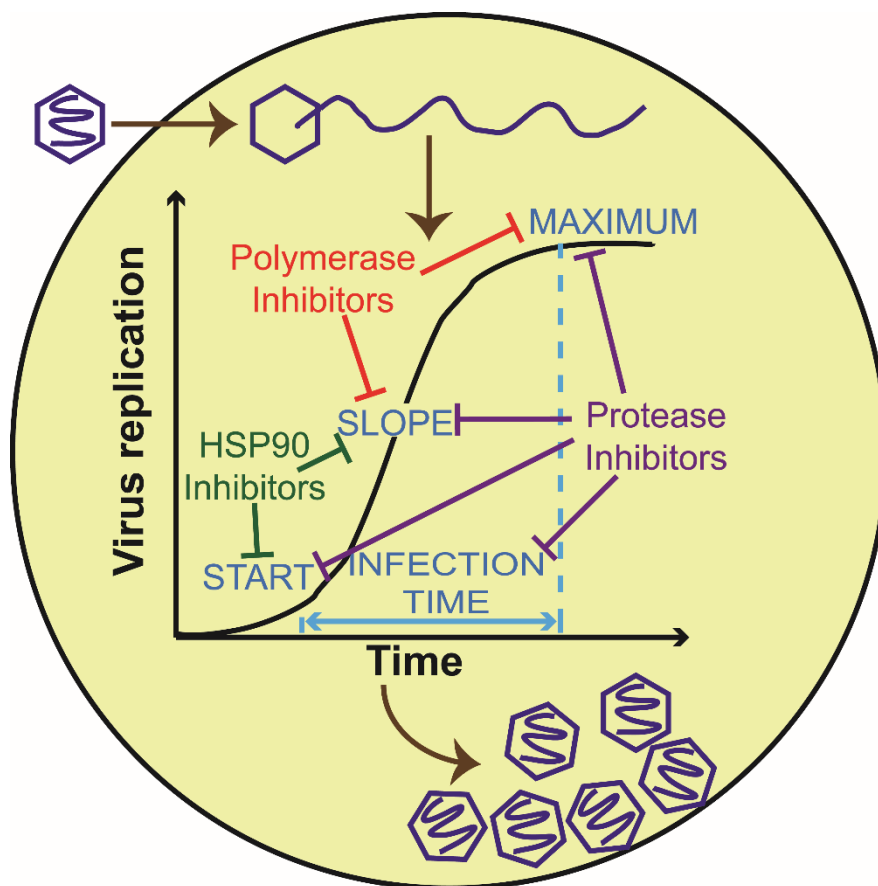

492
